# Supplementary material
Source: PubMed Central journal article supplement (PMC4355225)

1 **Figure E1. M-ADEPT Electronic Medication Monitor**

2 This figure illustrates the hardware and case of the M-ADEPT electronic medication monitor.  
3 The hardware is composed of a microcontroller and a Bluetooth modem. An open-source 3D  
4 modeling tool, Blender ([blender.org](http://blender.org)), was used to design the cases housing the electronic  
5 components and the medication (constructed using a fused filament fabrication 3D printer).

6 **Figure E2. M-ADEPT System**

7 This figure diagrams the flow of information between the M-ADEPT electronic medication  
8 monitors, smartphone application, Health Cloud, asthma clinician, and study participant.

9

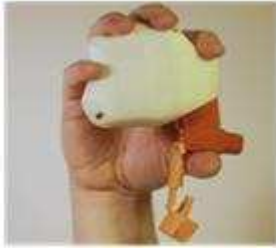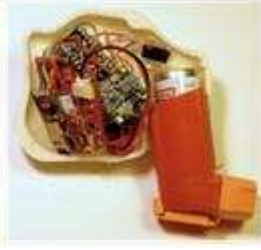

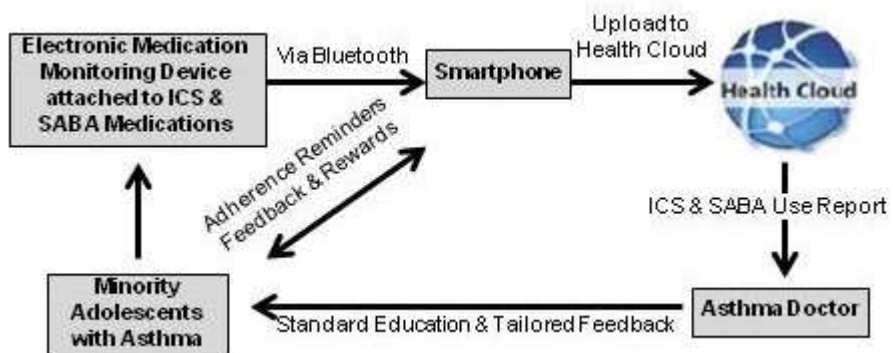

Supplement: NIHMS655906-supplement-01.pdf [file NIHMS655906-supplement-01.pdf]
